# Supplementary material for: π-π-Stacked Poly(ε-caprolactone)-b-poly(ethylene glycol) Micelles Loaded with a Photosensitizer for Photodynamic Therapy
Source: MDPI journal article supplement (doi:10.3390/pharmaceutics12040338), 2020-04-09
Supplement: s1 [file s1]

# Supplementary Materials: $\pi$ - $\pi$ Stacked Poly( $\epsilon$ -caprolactone)-*b*-poly(ethylene glycol) Micelles Loaded With Photosensitizer for Photodynamic Therapy

Yanna Liu, Marcel H.A.M. Fens, Bo Lou, Nicky C.H. van Kronenburg, Roel F.M. Maas-Bakker, Robbert J. Kok, Sabrina Oliveira, Wim E. Hennink and Cornelus F. van Nostrum \*

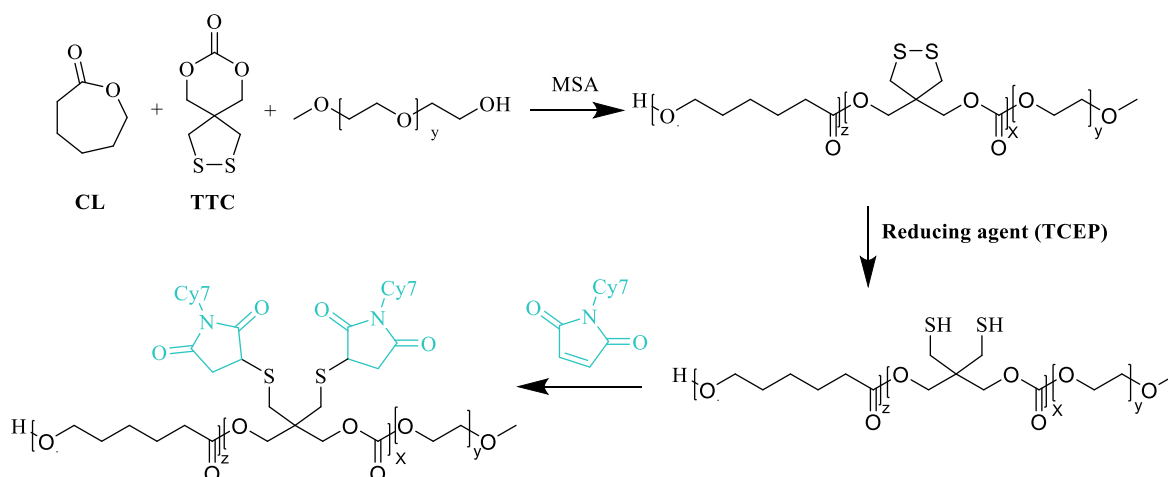

Scheme S1. Synthesis and Cy7 labeling of P(CL<sub>18</sub>-TTC<sub>7.5</sub>)-PEG [1].

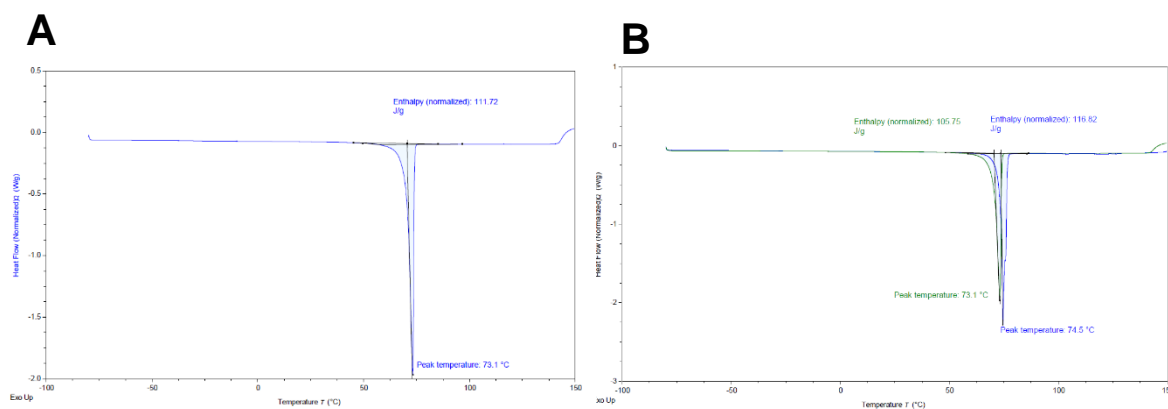

Figure S1. Thermograms of benzyl 2,2-bis(hydroxymethyl)propionate (A) and benzyl 5-methyl-2-oxo-1,3-dioxane-5-carboxylate (before (green line) and after (blue line) recrystallization) (B), recorded by DSC.

### A <sup>1</sup>H-NMR

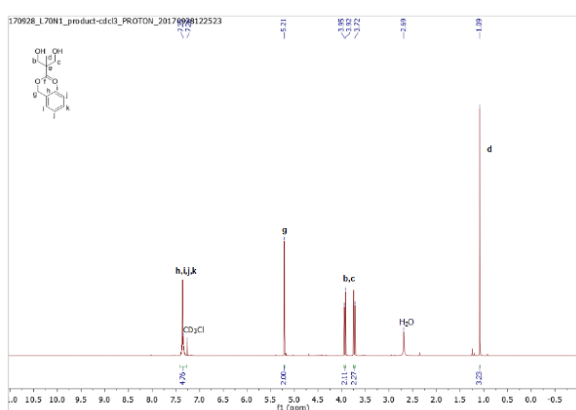

### B <sup>13</sup>C-NMR

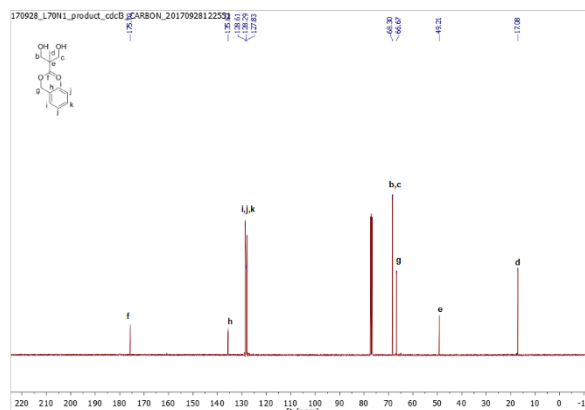

### C <sup>1</sup>H-NMR

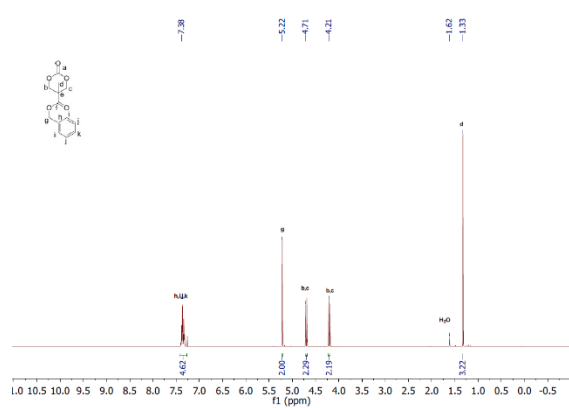

### D <sup>13</sup>C-NMR

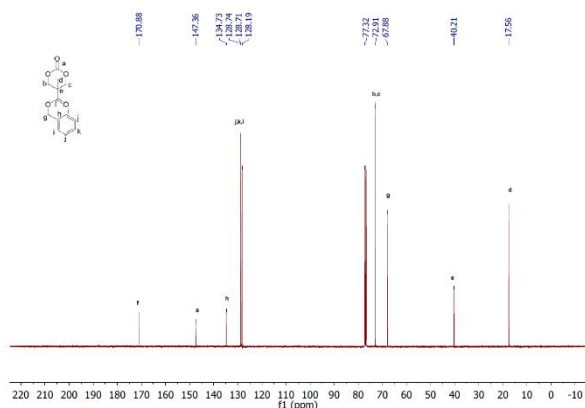

**Figure S2.** <sup>1</sup>H/<sup>13</sup>C NMR spectra of the benzyl 2,2-bis(methylol)propionate intermediate (A, B) and benzyl 5-methyl-2-oxo-1,3-dioxane-5-carboxylate (*i.e.*, TMC-Bz) (C, D).

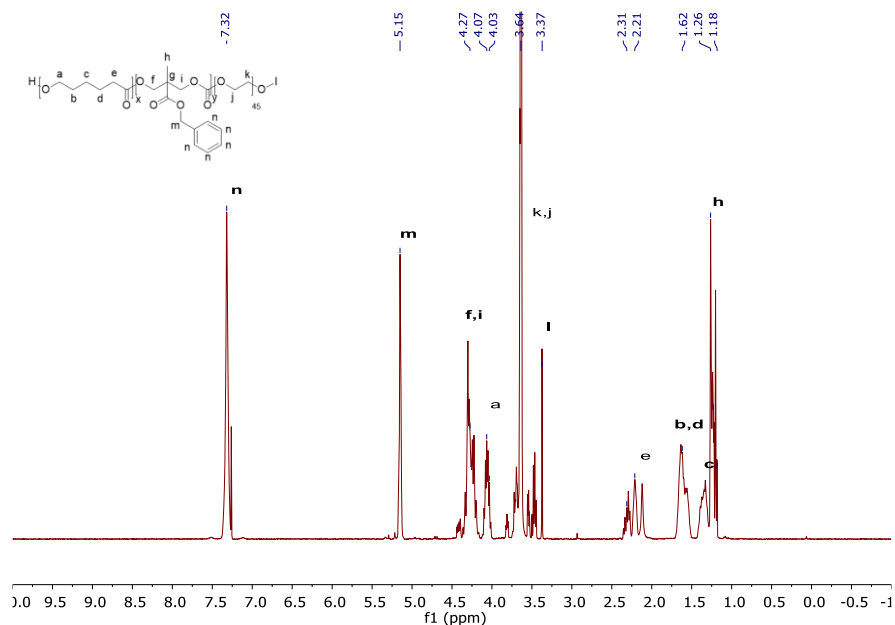

**Figure S3.** <sup>1</sup>H NMR spectrum of P(CL-TMC-Bz)-PEG. <sup>1</sup>H-NMR (600 MHz, CDCl<sub>3</sub>): δ 7.34 (m, CH<sub>2</sub>C<sub>6</sub>H<sub>5</sub>), 5.15 (s, CH<sub>2</sub>C<sub>6</sub>H<sub>5</sub>), 4.30–4.05 (m, COOCH<sub>2</sub>CH<sub>2</sub>OCO, COCH<sub>2</sub>CH<sub>2</sub>CH<sub>2</sub>CH<sub>2</sub>CH<sub>2</sub>O), 3.64 (m, PEG protons), 3.38 (s, 3H, CH<sub>3</sub>O), 2.30 (m, CH<sub>2</sub>CH<sub>2</sub>CH<sub>2</sub>COO), 1.62 (m, CH<sub>2</sub>CH<sub>2</sub>CH<sub>2</sub>CH<sub>2</sub>), 1.34 (m, CH<sub>2</sub>CH<sub>2</sub>CH<sub>2</sub>CH<sub>2</sub>), 1.27–1.21 (m, OCH<sub>2</sub>CH<sub>3</sub>).

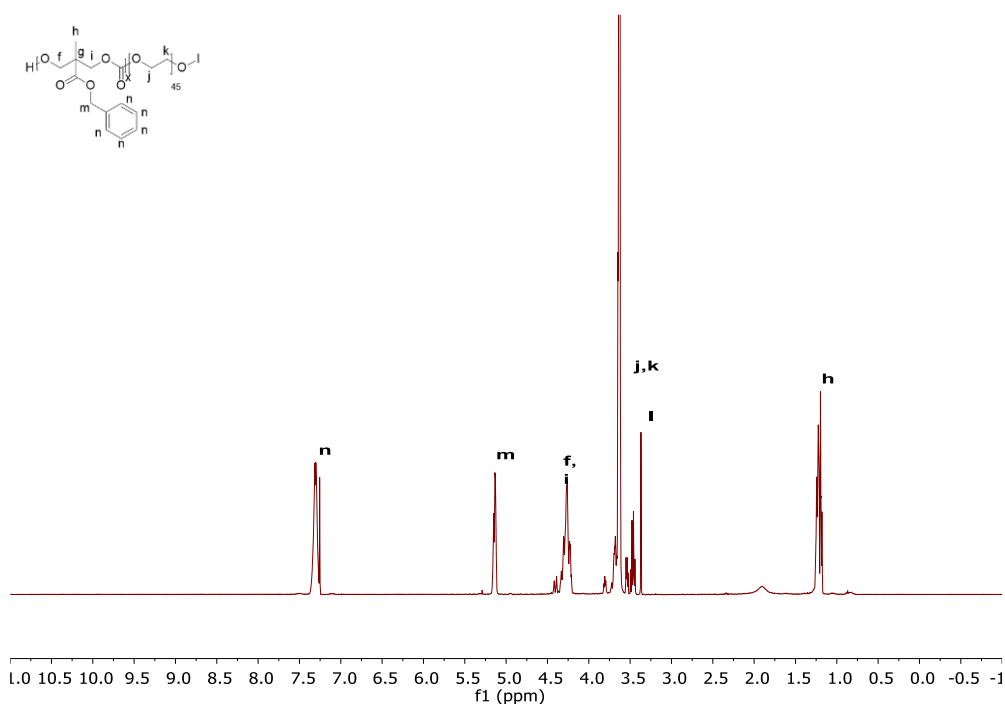

**Figure S4.**  $^1\text{H}$  NMR spectrum of P(TMC-Bz)-PEG.  $^1\text{H}$ -NMR (600 MHz,  $\text{CDCl}_3$ ):  $\delta$  7.34 (m,  $\text{CH}_2\text{C}_6\text{H}_5$ ), 5.15 (s,  $\text{CH}_2\text{C}_6\text{H}_5$ ), 4.30–4.05 (m,  $\text{COOCH}_2\text{CCH}_2\text{OCO}$ ,  $\text{COCH}_2\text{CH}_2\text{CH}_2\text{CH}_2\text{CH}_2\text{O}$ ), 3.64 (m, PEG protons), 3.38 (s, 3H,  $\text{CH}_3\text{O}$ ), 1.28 (m,  $\text{OCH}_2\text{CCH}_3$ ).

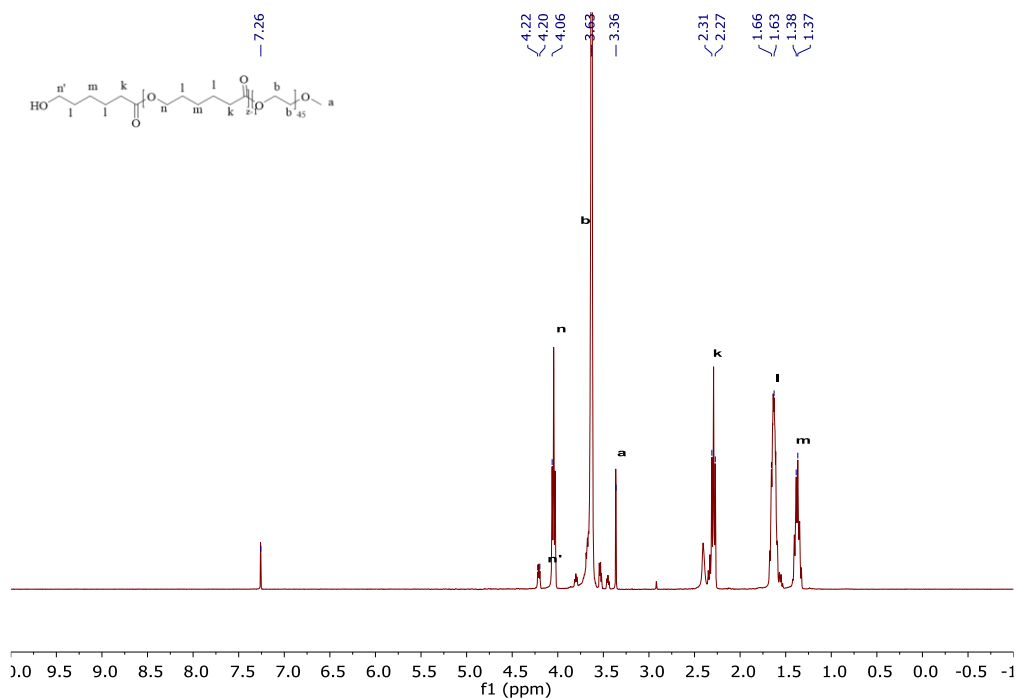

**Figure S5.**  $^1\text{H}$  NMR spectrum of PCL-PEG.  $^1\text{H}$ -NMR (600 MHz,  $\text{CDCl}_3$ ):  $\delta$  4.29–4.00 (m,  $\text{COOCH}_2\text{CH}_2\text{CH}_2\text{OH}$ ), 3.64 (m, PEG protons), 3.37 (s,  $\text{CH}_3\text{O}$ ), 2.29 (m,  $\text{CH}_2\text{CH}_2\text{CH}_2\text{COO}$ ), 1.66 (m,  $\text{CH}_2\text{CH}_2\text{CH}_2\text{CH}_2\text{CH}_2$ ), 1.38 (m,  $\text{CH}_2\text{CH}_2\text{CH}_2\text{CH}_2\text{CH}_2$ ).

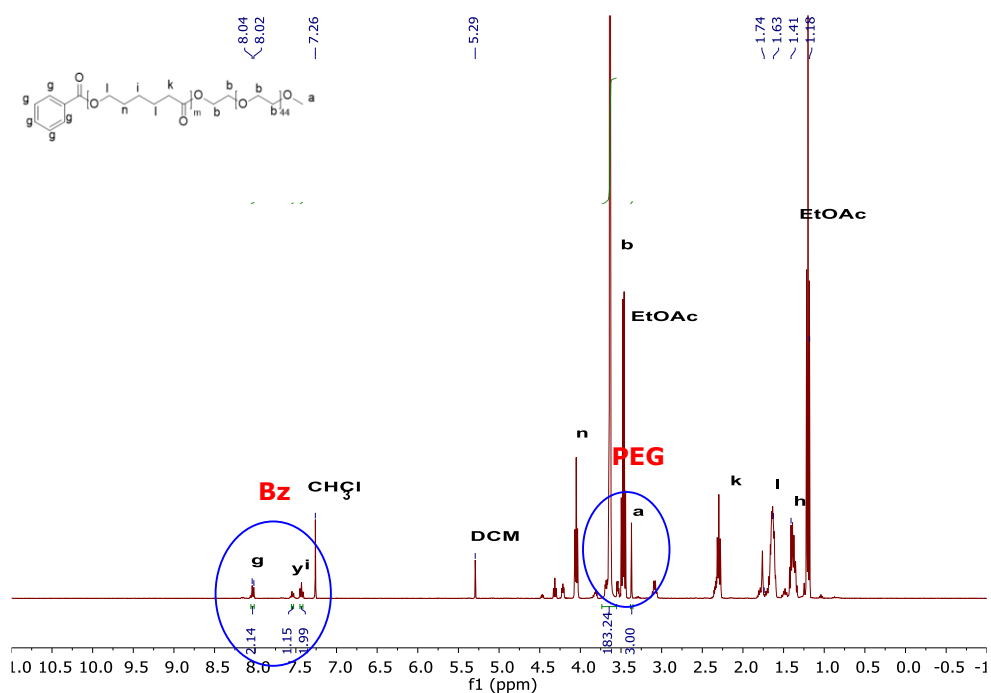

**Figure S6.**  $^1\text{H}$  NMR spectrum of Bz-PCL-PEG.  $^1\text{H}$ -NMR (600 MHz,  $\text{CDCl}_3$ ):  $\delta$  8.0 (d, 2H, aromatic CH), 7.53 (t, 1H, aromatic CH), 7.41 (t, 2H, aromatic CH), 4.29 (t, 2H,  $\text{C}_6\text{H}_5\text{COOCH}_2$ ), 4.20–4.00 (m,  $\text{COOCH}_2$ ,  $\text{CH}_2\text{CH}_2\text{OH}$ ), 3.64 (m, PEG protons), 3.37 (s,  $\text{CH}_3\text{O}$ ), 2.29 (m,  $\text{CH}_2\text{CH}_2\text{CH}_2\text{COO}$ ), 1.66 (m,  $\text{CH}_2\text{CH}_2\text{CH}_2\text{CH}_2$ ), 1.38 (m,  $\text{CH}_2\text{CH}_2\text{CH}_2\text{CH}_2$ ).

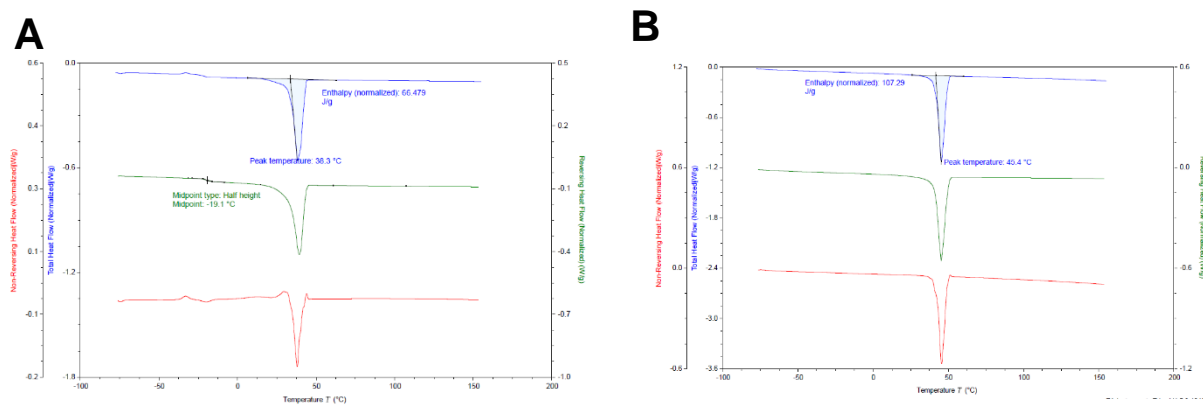

**Figure S7.** Thermograms of P( $\text{CL}_{9.1}$ -TMC-Bz $_{7.7}$ )-PEG (Entry 7, table 1) and PCL $_{17.6}$ -PEG (Entry 5, table 1), recorded by DSC.

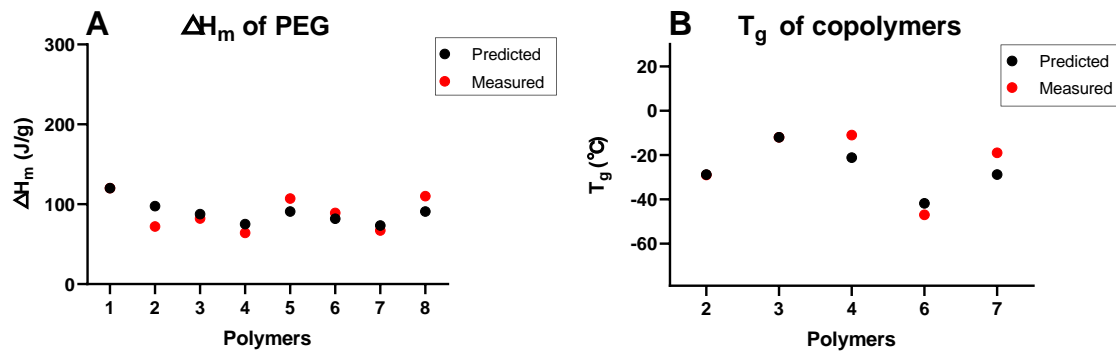

**Figure S8.** (A) Measured  $\Delta H_m$ 's of PEG in the synthesized block copolymers (red dots), corrected for the weight fraction of PEG of the block copolymer. The predicted  $\Delta H_m$ 's (black dots) were obtained by using mPEG-OH (measured  $\Delta H_m$  of 182 J/g and the weight fraction of PEG in the block copolymers) as the reference. (B) Measured  $T_g$ 's of the synthesized P(CL-TMC-Bz)-PEG copolymers (red dots) with random CL and TMC-Bz sequence. Predicted  $T_g$ 's (black dots) were calculated based on FOX equation in which  $T_g$  of  $-60$  °C for high molecular weight PCL<sub>80</sub> [2] and  $T_g$  of  $-12$  °C for P(TMC-Bz) (obtained from P(TMC-Bz<sub>8.6</sub>)-PEG, Entry 3, table 1) were used as the reference for the prediction. The numbers of the polymers on the x-axis correspond to the same entries in table 1.

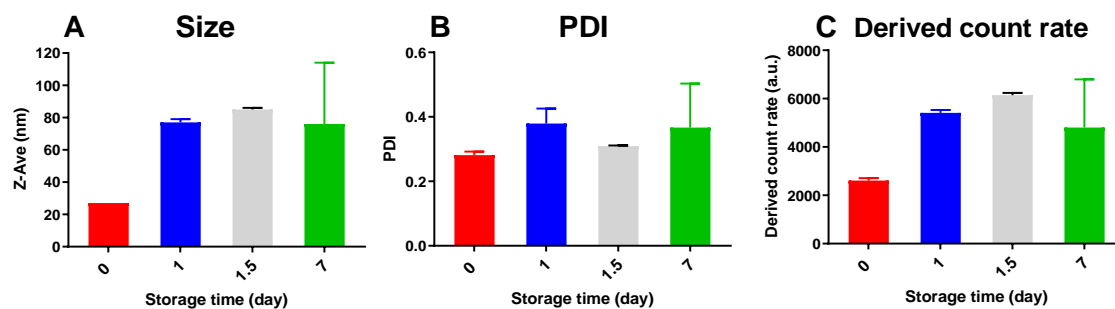

**Figure S9.** Size (A), PDI (B) and derived count rate (C) of PCL<sub>9</sub>-PEG micelles in PBS after storage at room temperature over a period of 7 days.

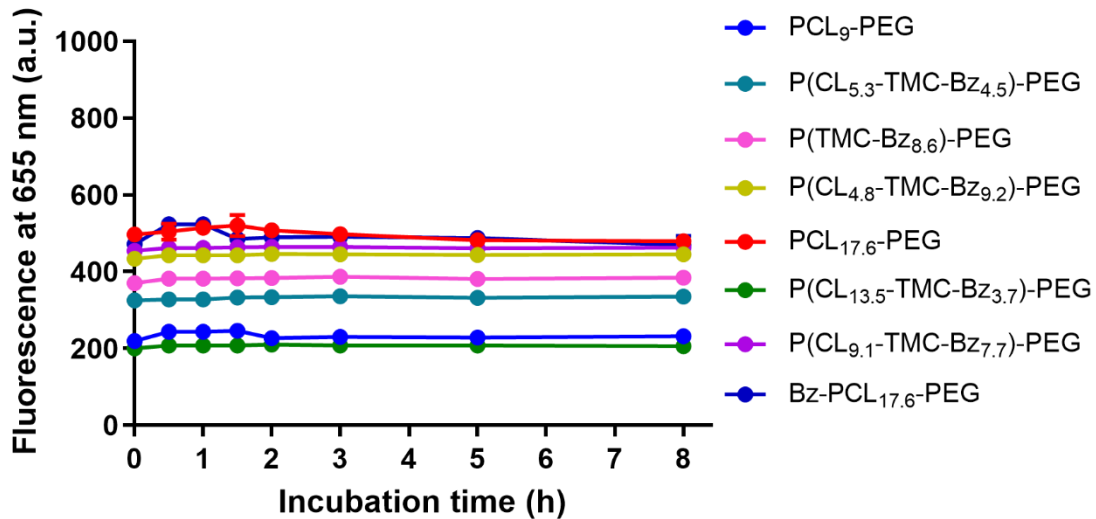

**Figure S10.** Fluorescence intensity ( $\lambda_{ex}$  420 nm,  $\lambda_{em}$  655 nm) as a function of time at 37 °C in PBS; micelles of 10 mg/mL with 5 wt% loading amounts were prepared and diluted 10 $\times$  in PBS, to obtain the final mTHPC concentration of 40  $\mu$ g/mL.

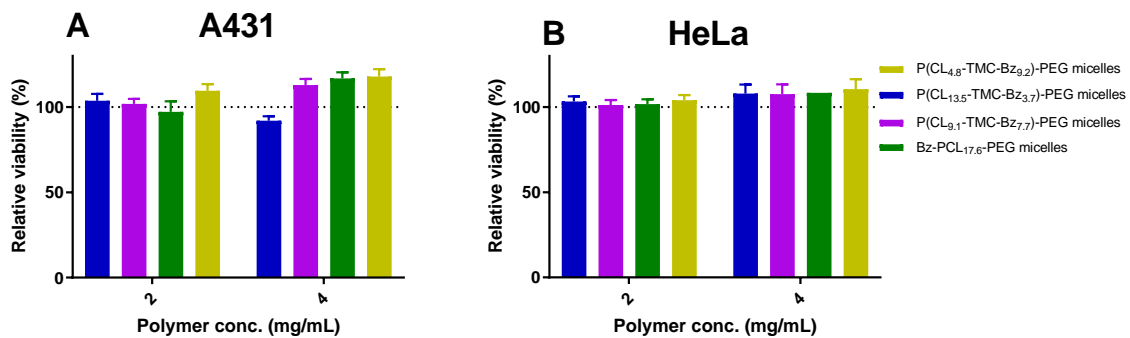

**Figure S11.** Cytotoxicity by MTS assay of different empty micelles composed of 2 and 4 mg/mL polymer on A431 and HeLa cells after 24 h incubation (n = 3).

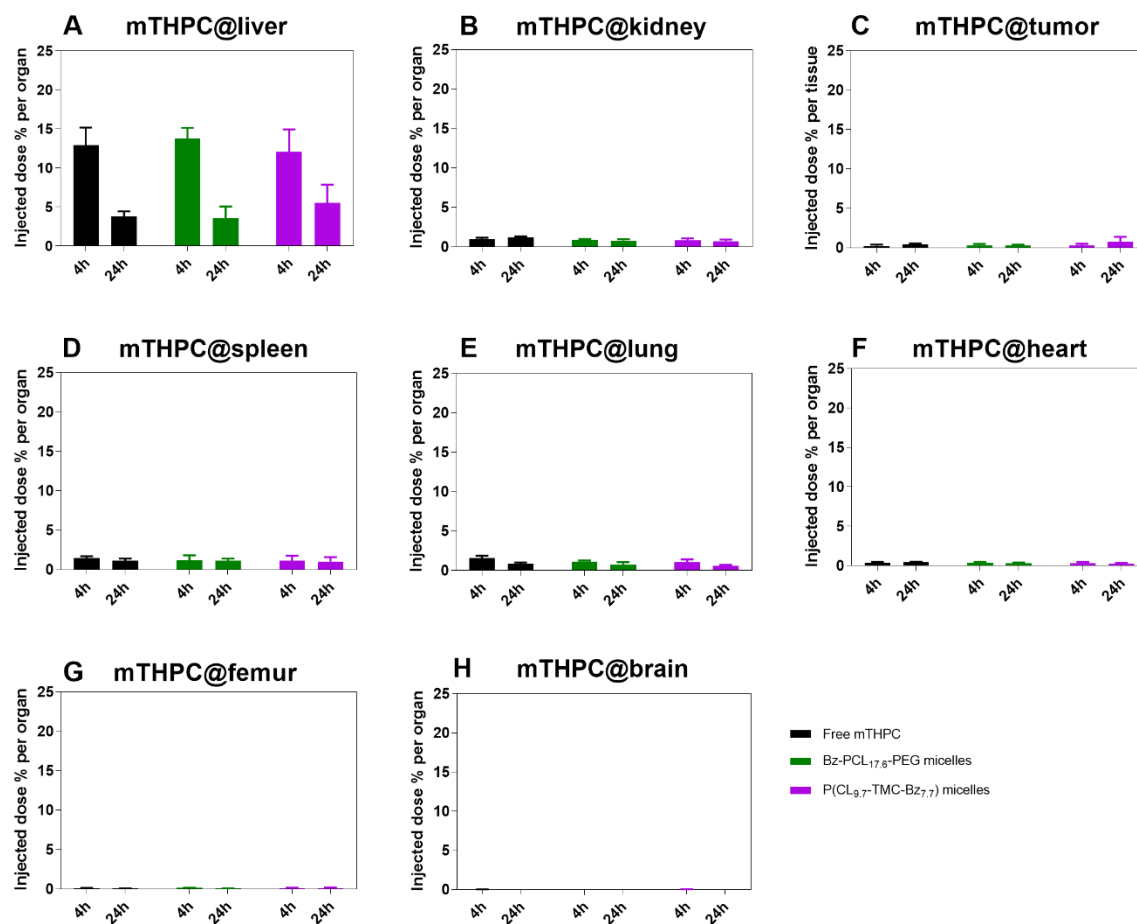

**Figure S12.** Biodistribution of free mTHPC and mTHPC loaded in micelles in tumor and main organs of mice after 4 and 24 h administration of the formulations at a mTHPC dose of 0.3 mg/kg. Data are indicated as the percentage of the injected mTHPC (%ID) present per organ/tumor (n = 3-5).

## Reference

1. Liu, Y.; Scrivano, L.; Peterson, J.D.; Fens, M.H.A.M.; Hernández, I.B.; Mesquita, B.; Toraño, J.S.; Hennink, W.E.; Nostrum, C.F.; Oliveira, S. EGFR targeted nanobody functionalized polymeric micelles loaded with mTHPC for selective photodynamic therapy. *Mol. Pharmaceutics* **2020**, *17*, 1276–1292.
2. Couffin, A.; Delcroix, D.; Martín-Vaca, B.; Bourissou, D.; Navarro, C. Mild and efficient preparation of block and gradient copolymers by methanesulfonic acid catalyzed ring-opening polymerization of caprolactone and trimethylene carbonate. *Macromolecules* **2013**, *46*, 4354–4360.
